# Supplementary material for: Antimicrobial Efficacy of Contact Lens Solutions Assessed by ISO Standards
Source: MDPI journal article supplement (doi:10.3390/microorganisms9102173), 2021-10-19
Supplement: s1 [file s1]

**Supplemental Digital Content:**

**Table S1. Each microorganism with the testing condition and its inoculum control CFU/mL.**

| Pathogen                                                       | CFU/mL                      |
|----------------------------------------------------------------|-----------------------------|
| <i>Fusarium chlamydosporum</i><br>AMC 5663                     | 1.6 - 8.5 x 10 <sup>5</sup> |
| <i>Fusarium keratoplasticum</i><br>ATCC 36031                  | 2.2 - 3.1 x 10 <sup>5</sup> |
| <i>Fusarium roseum</i><br>AMC 5662                             | 1.1 – 2.2 x 10 <sup>5</sup> |
| Clinical keratitis isolate<br><i>Fusarium spp.</i><br>AMC 1620 | 1.5 - 4.0 x 10 <sup>5</sup> |
| <i>Serratia marcescens</i><br>ATCC 36031                       | 2.9 – 9.6 x 10 <sup>5</sup> |

**Figure S1. Multi-purpose solutions (MPSs) and contact lenses challenged with *Serratia marcescens* ATCC 13880 at the manufacturer's disinfection time (DT).** Disinfection efficacy is stated in mean ± standard error log reduction compared to inoculum control. \* p < 0.05 vs. No Lens challenge at the same time point and within the same MPS. n=3/group.

**Figure S2. Multi-purpose solutions (MPSs) and contact lenses challenged with *Fusarium roseum* AMC 5662 at the manufacturer's disinfection time (DT).** Disinfection efficacy is stated in mean ± standard error log reduction compared to inoculum control. \* p < 0.05 vs. No Lens challenge at the same time point and within the same MPS. Statistical differences between product families: *a* p < 0.05 vs. OPTI-FREE (OF) Puremoist with Air Optix HG, *b* p < 0.05 vs. OPTI-FREE Express with Air Optix HG, *c* p < 0.05 vs. OPTI-FREE Replenish with Air Optix HG; *aa* p < 0.05 vs. OPTI-FREE Puremoist with other manufacturer lens, *bb* p < 0.05 vs. OPTI-FREE Express with other manufacturer lens, *cc* p < 0.05 vs. OPTI-FREE Replenish with other manufacturer lens. n=3/group.
